# Supplementary material for: Identification of Plant Peptides as Novel Inhibitors of Orthohepevirus A (HEV) Capsid Protein by Virtual Screening
Source: MDPI journal article supplement (doi:10.3390/molecules28062675), 2023-03-16
Supplement: s1 [file s1]

# Identification of Plant Peptides as Novel Inhibitors of Orthohepevirus A (HEV) Capsid Protein by Virtual Screening

Ghulam Mustafa <sup>1,\*</sup>, Hafiza Salaha Mahrosh <sup>2</sup>, Syed Awais Attique <sup>3,4</sup>, Rawaba Arif <sup>5</sup>, Mohammad Abul Farah <sup>6</sup>, Khalid Mashay Al-Anazi <sup>6</sup> and Sajad Ali <sup>7</sup>

<sup>1</sup> Department of Biochemistry, Government College University Faisalabad, Faisalabad 38000, Pakistan

<sup>2</sup> Department of Biochemistry, University of Agriculture Faisalabad, Faisalabad 38000, Pakistan

<sup>3</sup> School of Interdisciplinary Engineering & Science (SINES), National University of Sciences & Technology (NUST), Islamabad 44000, Pakistan

<sup>4</sup> Agency for Science, Technology and Research (A\*STAR), Bioinformatics Institute, 30 Biopolis Street, Matrix, Singapore 138671, Singapore

<sup>5</sup> Department of Biochemistry, University of Jhang, Jhang 35200, Pakistan

<sup>6</sup> Department of Zoology, College of Science, King Saud University, P.O. Box 2455, Riyadh 11451, Saudi Arabia

<sup>7</sup> Department of Biotechnology, Yeungnam University, Gyeongsan 38541, Republic of Korea

\* Correspondence: drghulammustafa@gcuf.edu.pk

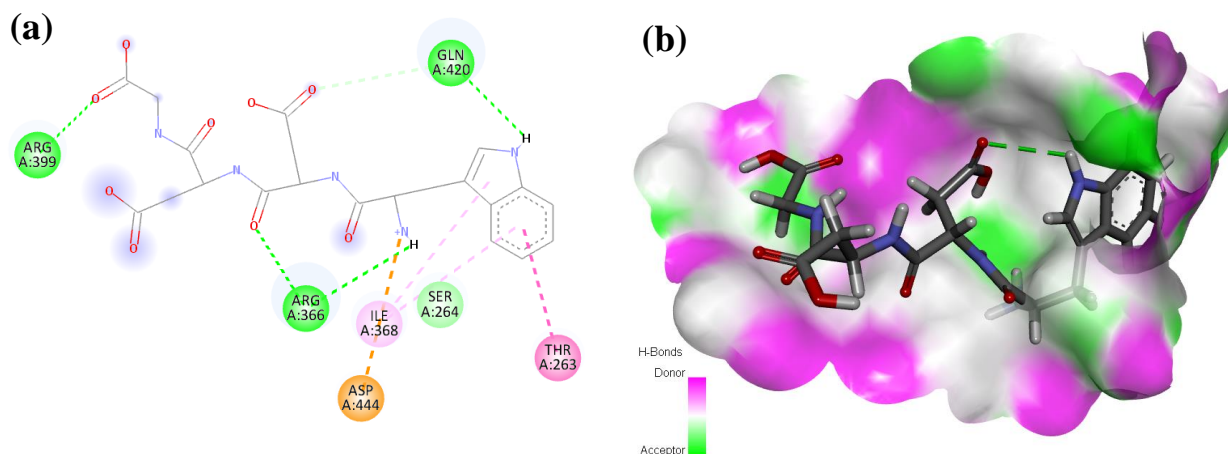

**Figure S1.** Interactions (a) and binding patterns (b) of WDDG peptide with ORF2 (capsid protein) of HEV as receptor.

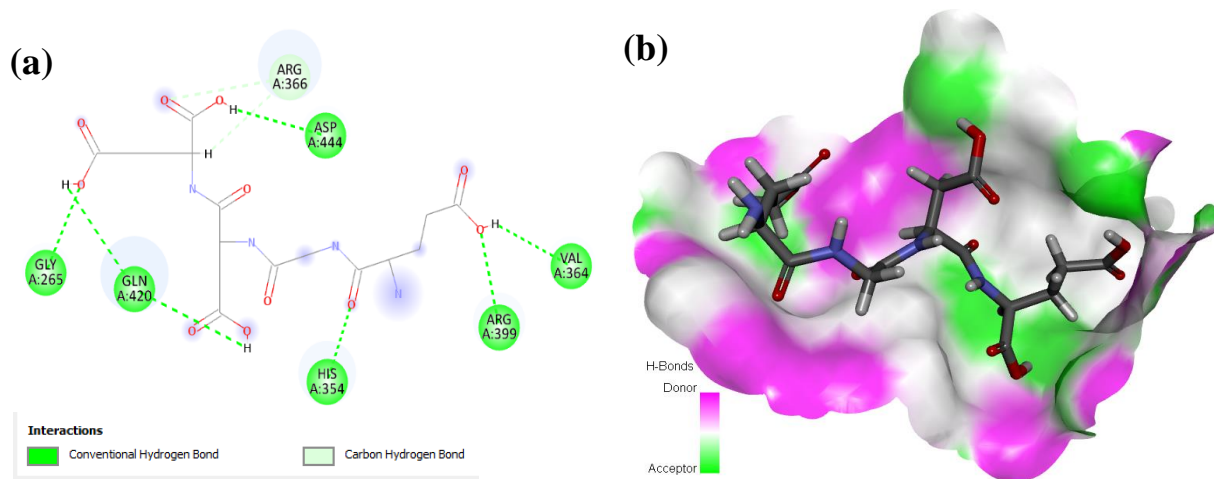

**Figure S2.** Interactions (a) and binding patterns (b) of EGDE peptide with ORF2 (capsid protein) of HEV as receptor.

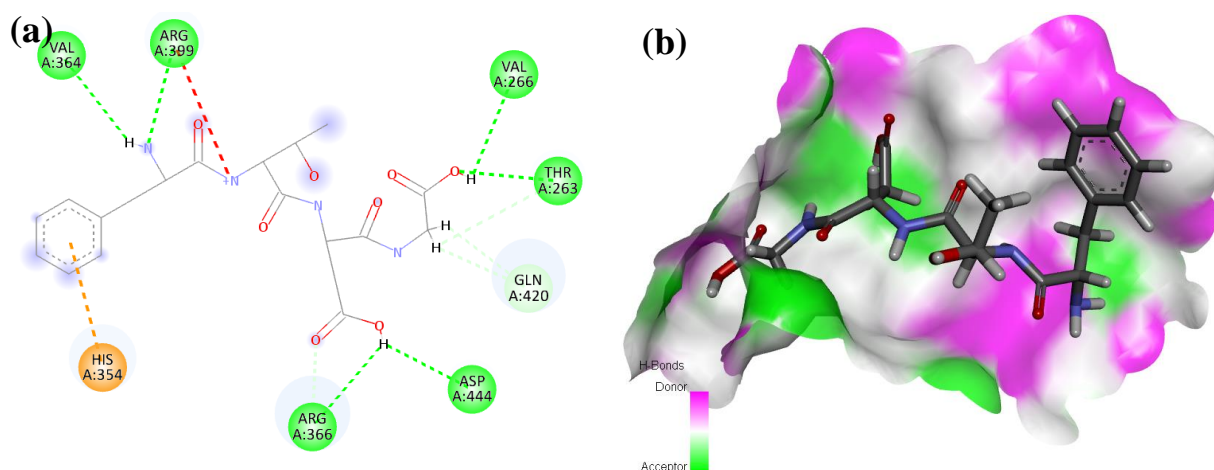

**Figure S3.** Interactions (a) and binding patterns (b) of FTDG peptide with ORF2 (capsid protein) of HEV as receptor.

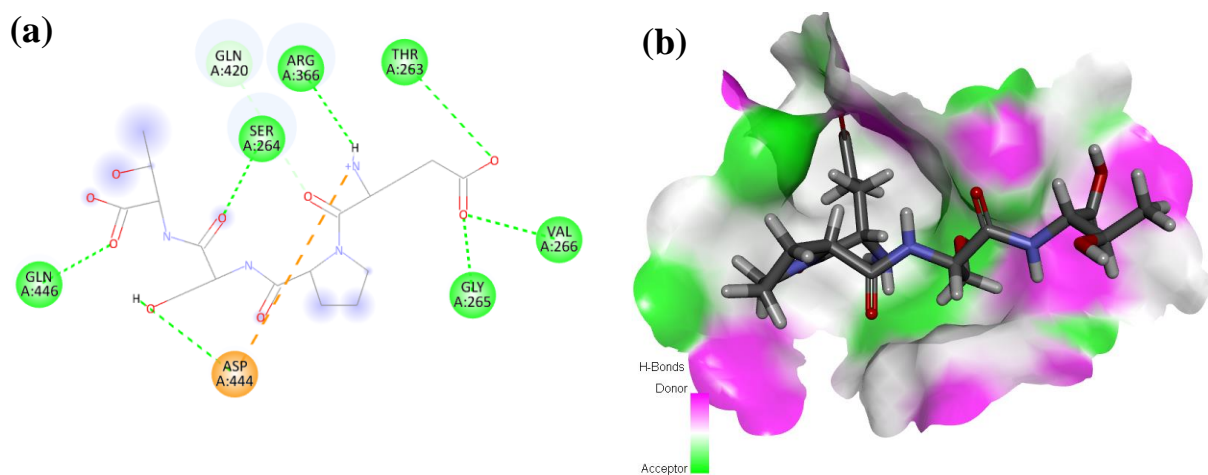

**Figure S4.** Interactions (a) and binding patterns (b) of EPST peptide with ORF2 (capsid protein) of HEV as receptor.

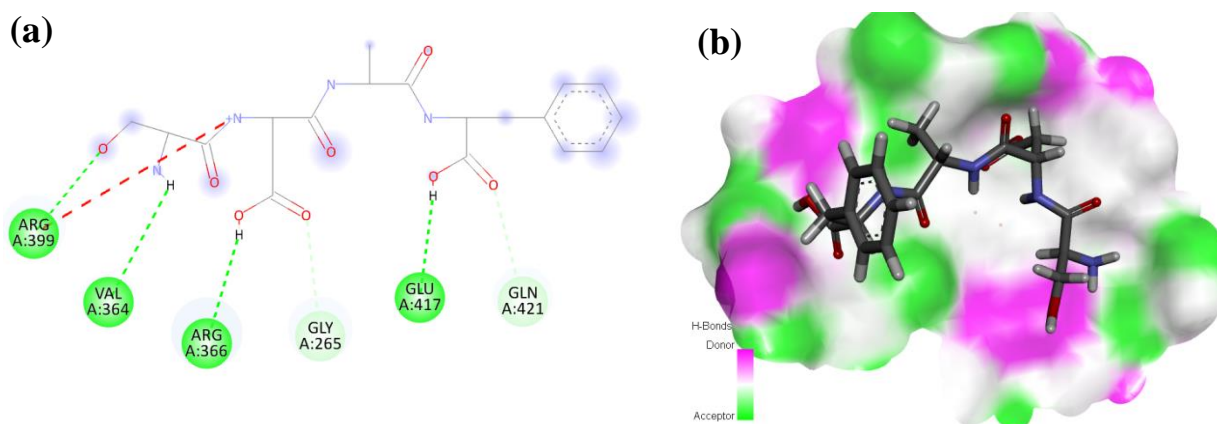

**Figure S5.** Interactions (a) and binding patterns (b) of SDAF peptide with ORF2 (capsid protein) of HEV as receptor.

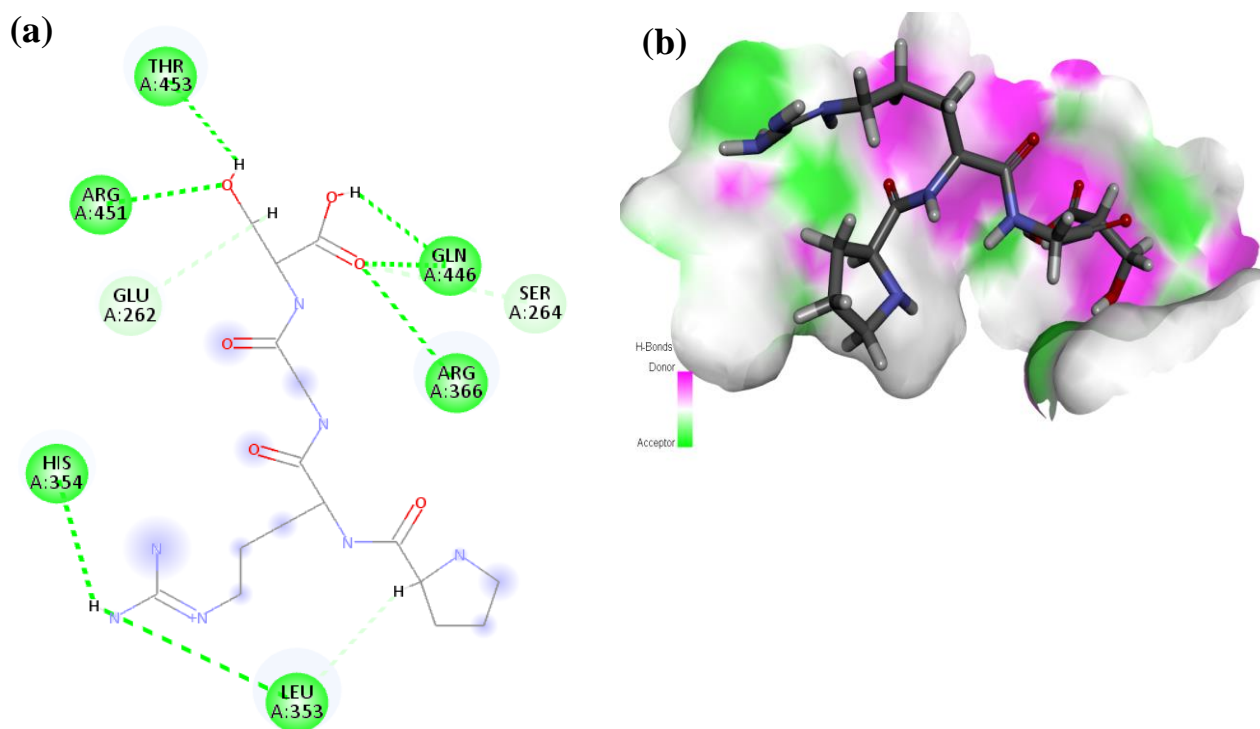

**Figure S6.** Interactions (a) and binding patterns (b) of PRGS peptide with ORF2 (capsid protein) of HEV as receptor.

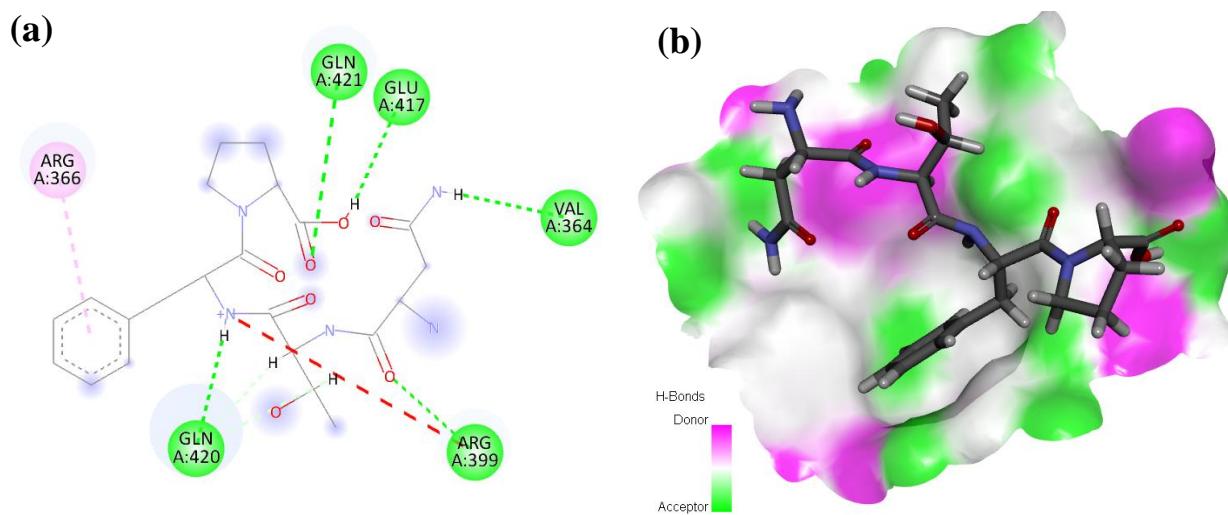

**Figure S7.** Interactions (a) and binding patterns (b) of NTFP peptide with ORF2 (capsid protein) of HEV as receptor.

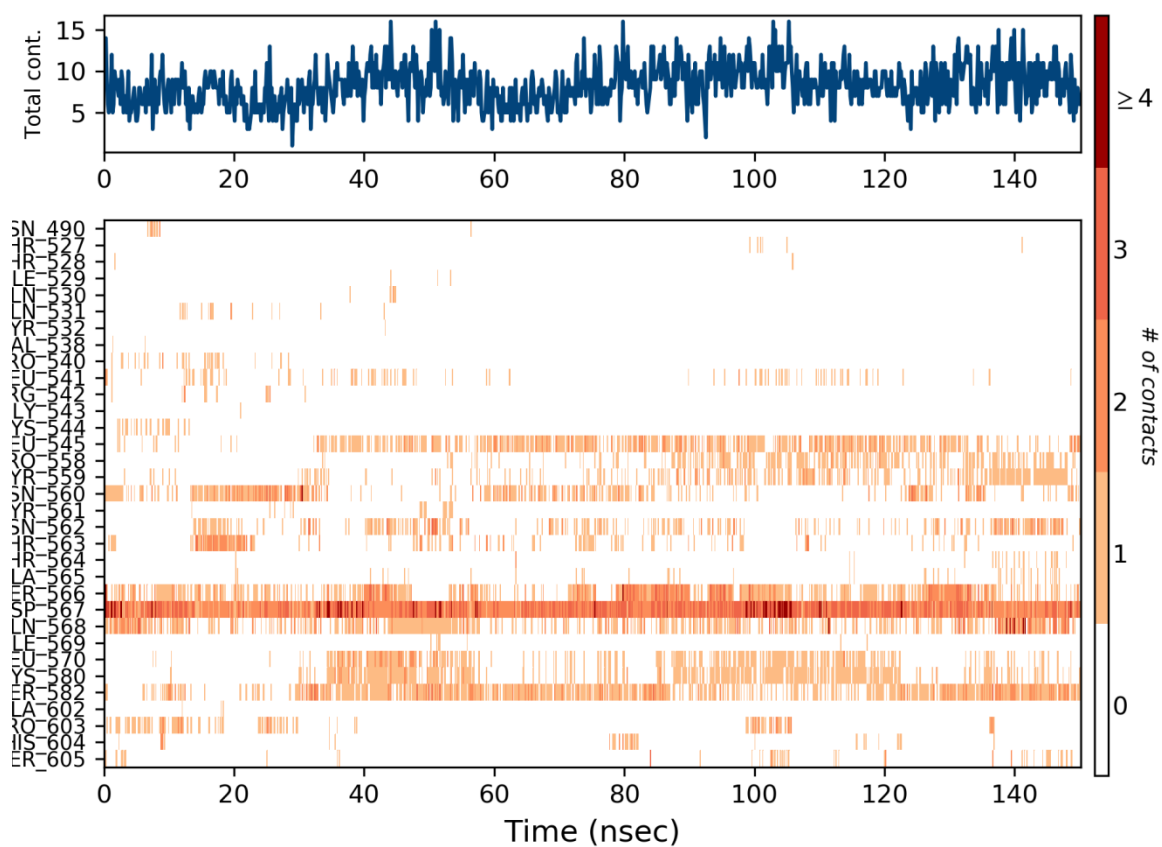

**Figure S8.** Hydrogen bond interaction stability (consistency) of key residues of capsid protein with GSTR peptide.

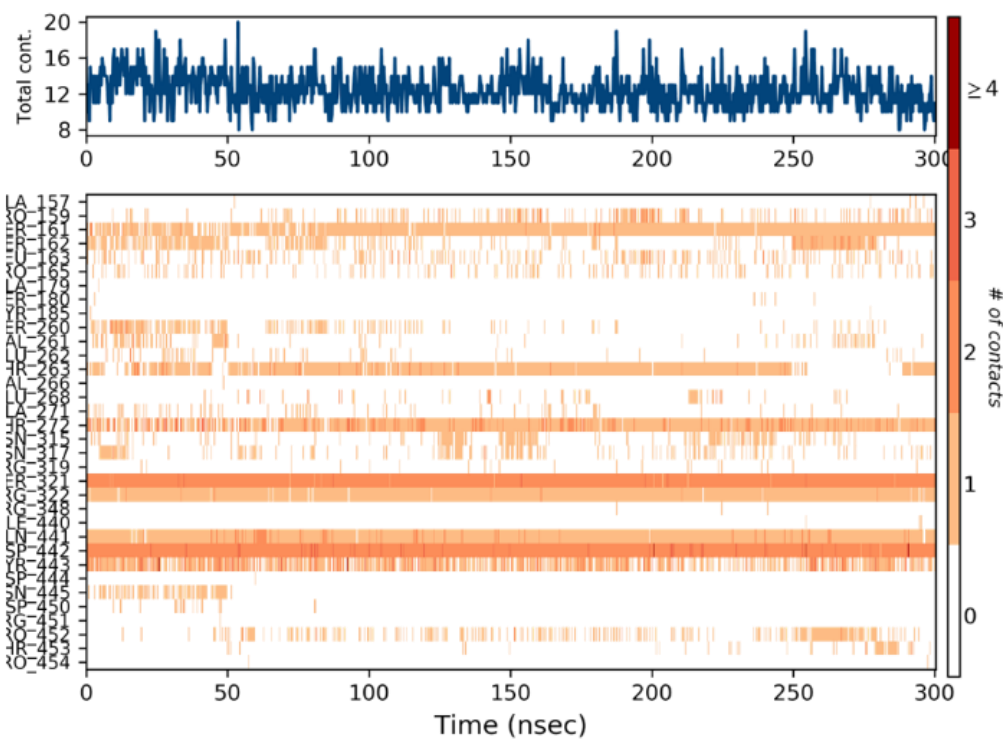

**Figure S9.** Hydrogen bond interaction stability (consistency) of key residues of capsid protein with TDGH peptide.

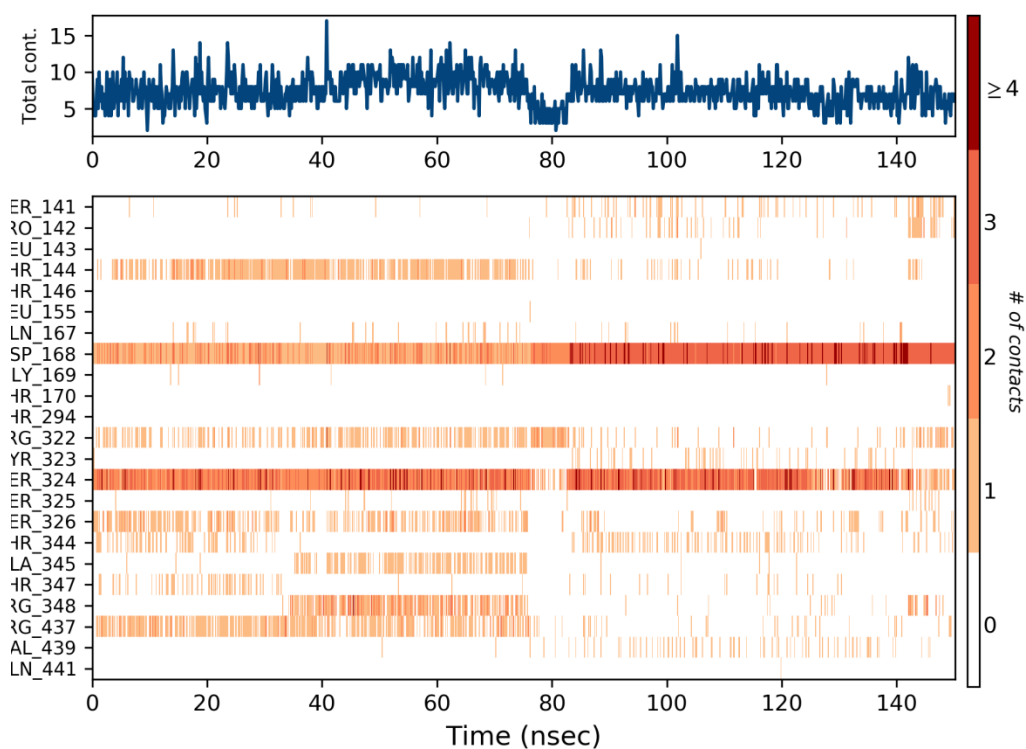

**Figure S10.** Hydrogen bond interaction stability (consistency) of key residues of capsid protein with LEEV peptide.

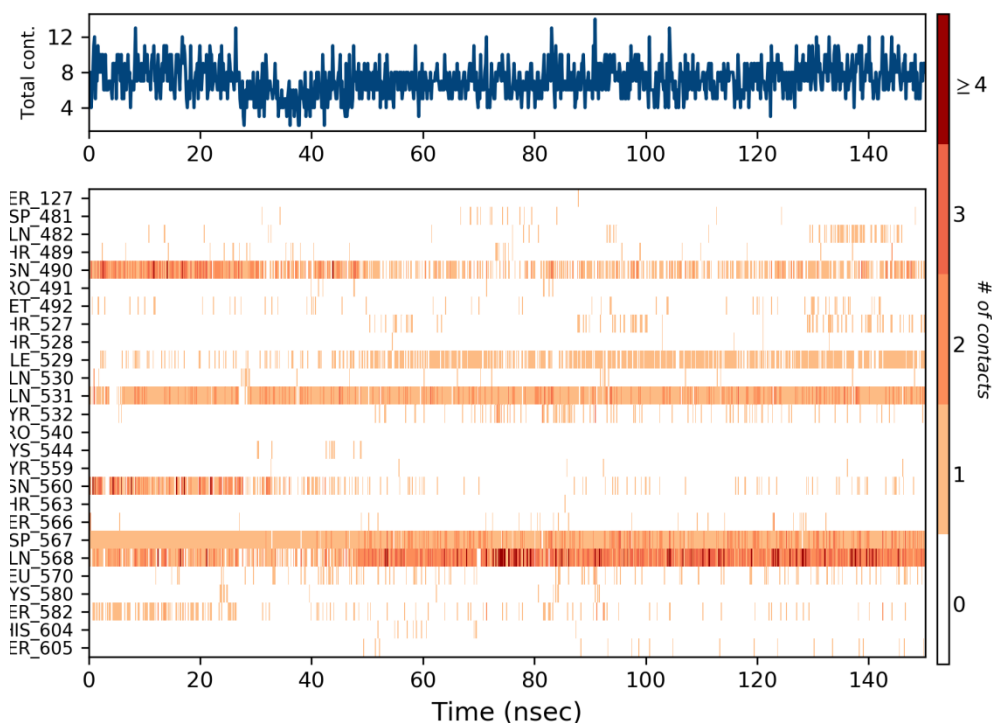

**Figure S11.** Hydrogen bond interaction stability (consistency) of key residues of capsid protein with WDDG peptide.
